# Supplementary material for: The Accumulation of Progerin Underlies the Loss of Aortic Smooth Muscle Cells in Hutchinson-Gilford Progeria Syndrome
Source: PubMed Central journal article supplement (PMC11565845; doi:10.1101/2024.10.29.620896), 2024-11-03
Supplement: NIHPP2024.10.29.620896v1-supplement-1.pdf [file NIHPP2024.10.29.620896v1-supplement-1.pdf]

1 **Supplementary Materials**

2 The Accumulation of Progerin Underlies the Loss of Aortic Smooth Muscle Cells in Hutchinson-  
3 Gilford Progeria Syndrome

4

5 Paul H. Kim, Joonyoung R. Kim, Patrick J. Heizer, Hyesoo Jung, Yiping Tu, Ashley Presnell,  
6 Julia Scheithauer, Rachel G. Yu, Stephen G. Young, and Loren G. Fong

7

8

9 Contents

10 Materials and Methods

11 Figures S1–S7.

12 Tables S1–S3.

13

## 14 **Materials and Methods**

15 **Culture of aortic smooth muscle cells.** Immortalized mouse aortic smooth muscle cells (SMCs)  
16 were purchased from ATCC (#CRL-2797) and cultured in DMEM (Invitrogen) supplemented with  
17 10% (v/v) fetal bovine serum (HyClone), 1× nonessential amino acids, 2 mM glutamine, 1 mM  
18 sodium pyruvate, and 0.2 mg/ml G418 at 37°C with 5% CO<sub>2</sub>.

19 **Western blotting.** Urea-soluble protein extracts from tissues and SMCs were prepared as  
20 described previously (17, 21). The extracts were mixed with LDS sample buffer (Invitrogen) and  
21 heated at 70°C for 10 min. The samples were size-fractionated on 4–12% gradient polyacrylamide  
22 Bis-Tris gels (Invitrogen) and transferred to nitrocellulose membranes. The membranes were  
23 blocked with Odyssey Blocking solution (LI-COR Bioscience, Lincoln, NE) for 1 hour at RT and  
24 incubated with primary antibodies at 4°C overnight. After washing the membranes with PBS  
25 containing 0.2% Tween-20 (3 times for 10 min each), they were incubated with infrared (IR) dye-  
26 labeled secondary antibodies at RT for 1 hour. Membranes were washed with 0.2% PBS-T (3 times  
27 for 10 min each). The IR signals were quantified with an Odyssey infrared scanner (LI-COR  
28 Biosciences). The antibodies and concentrations are listed in **Supplementary Table 1**.

29 **Quantitative real time-PCR.** Total RNA was extracted with the RNeasy kit (Qiagen) and treated  
30 with DNase I (Ambion) according to the manufacturer's recommendation. RNA was reverse-  
31 transcribed with random primers using SuperScript III cDNA Synthesis Kit (Invitrogen). cDNA  
32 samples were diluted in nuclease-free water and stored at –80°C. RT-PCR reactions were  
33 performed on a QuantStudio5 system (ThermoFisher Scientific) with SYBR Green PCR Master  
34 Mix (Bioland). Transcript levels were calculated by the comparative cycle threshold method and  
35 normalized to cyclophilin A expression. All primers used in the experiments are listed in  
36 **Supplementary Table 2**.

37 **Doxycycline (Dox)-inducible expression in SMCs.** SMCs harboring Dox-inducible pTRIPZ  
38 expression vectors for human prelamin A and human progerin have been described previously (15,  
39 21). All plasmids were verified by DNA sequencing. Packaging of lentivirus and transduction of  
40 cells were performed by UCLA's Vector Core. Transduced cells were selected with 3 µg/ml

41 puromycin for two weeks; individual clones were isolated by limiting dilution in 96-well plates.  
42 Clones were screened by western blotting and immunofluorescence staining. A minimum of 2  
43 clones were isolated for each cell line.

44 **Constitutive expression of nuclear localized GFP and lamins in SMCs.** SMCs expressing green  
45 fluorescent protein (GFP) with a nuclear localization signal (nls-GFP) have been described  
46 previously (21, 31). Constitutive expression of human versions of prelamin A and progerin in  
47 SMCs was performed by transducing SMCs with pCLNR (#17735; Addgene) retroviral expression  
48 plasmids. The prelamin A and progerin cDNAs were subcloned into *HindIII* and *NotI* sites of  
49 pCLNR by In-Fusion cloning (Takara Bio). Human prelamin A cDNA was amplified with forward  
50 primer 5'-GCTAGCGAATTATGGAGACCCCGTCCCAGC-3' and reverse primer 5'-  
51 GATCCTTGCGGCCTTACATGATGCTGCAGT-3'; human progerin cDNA was amplified with  
52 forward primer 5'-GCTAGCGAATTATGGAGACCCCGTCCCAGC-3' and reverse primer 5'-  
53 CAGATCCTTGCGGCCTTACATGATGCTGCA-3'. All plasmid DNAs were prepared with  
54 Maxiprep kit (Qiagen) and verified by DNA sequencing. Packaging of virus and viral transduction  
55 were performed by UCLA's Vector Core. Transduced cells were selected with 3 µg/ml blasticidin  
56 or puromycin for two weeks; individual clones were isolated by limiting dilution. A minimum of  
57 2 clones were isolated for each cell line.

58

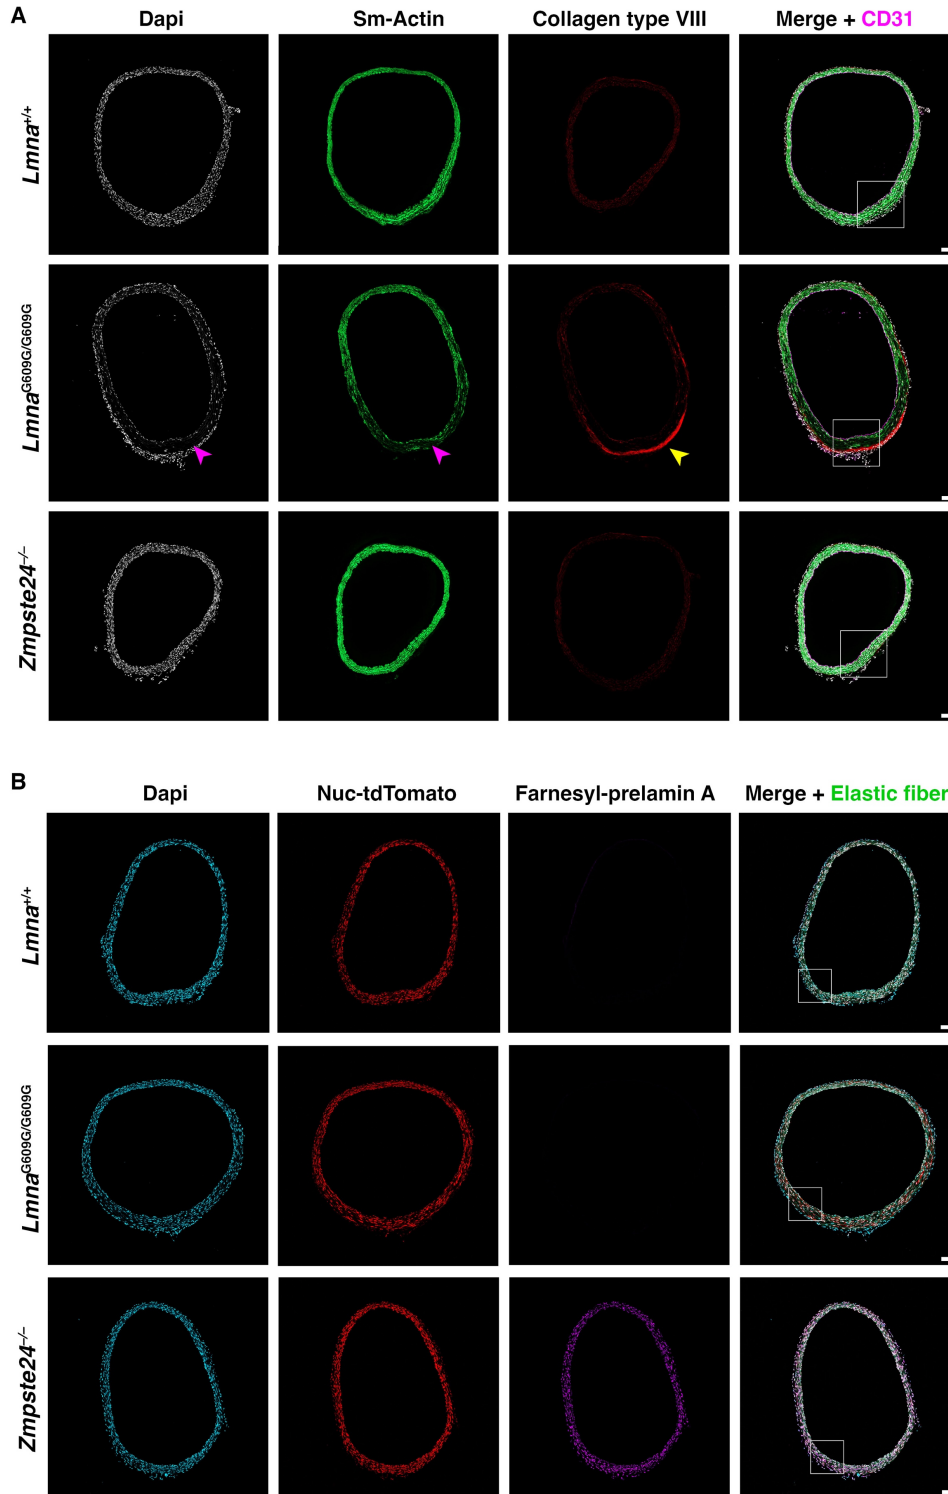

59 **Fig. S1. SMC loss and nuclear membrane ruptures are absent in the aorta of *Zmpste24*<sup>-/-</sup>**  
60 **mice. A.** Microscopy images of the proximal ascending aorta from 16-week-old *Lmna*<sup>+/+</sup>,  
61 *Lmna*<sup>G609G/G609G</sup>, and *Zmpste24*<sup>-/-</sup> mice stained with antibodies against smooth muscle actin (Sm-

62 actin, *green*), collagen type VIII (*red*), and CD31 (*magenta*). Nuclei were stained with Dapi  
63 (*white*). *Red* arrowheads point to areas with reduced numbers of SMC nuclei and reduced Sm-actin  
64 staining. The *yellow* arrowhead points to collagen type VIII staining in the adventitia. Scale bar,  
65 100  $\mu\text{m}$ . The boxed regions in the merged images are shown at higher magnification in Fig. 1A.  
66 **B.** Microscopy images of the proximal ascending aorta from 13-week-old *Lmna*<sup>+/+</sup> and  
67 *Lmna*<sup>G609G/G609G</sup> mice and a 21-week-old *Zmpste24*<sup>-/-</sup> mouse [all expressing a nuclear-targeted  
68 tdTomato (Nuc-tdTomato) transgene] stained with an antibody against farnesyl-prelamin A. The  
69 images show Dapi (*blue*), Nuc-tdTomato (*red*), farnesyl-prelamin A (*magenta*), and elastic fibers  
70 (*green*) in the merged image. Scale bar, 100  $\mu\text{m}$ . The boxed regions in the merged images are  
71 shown at higher magnification in Fig. 1B.

72

73

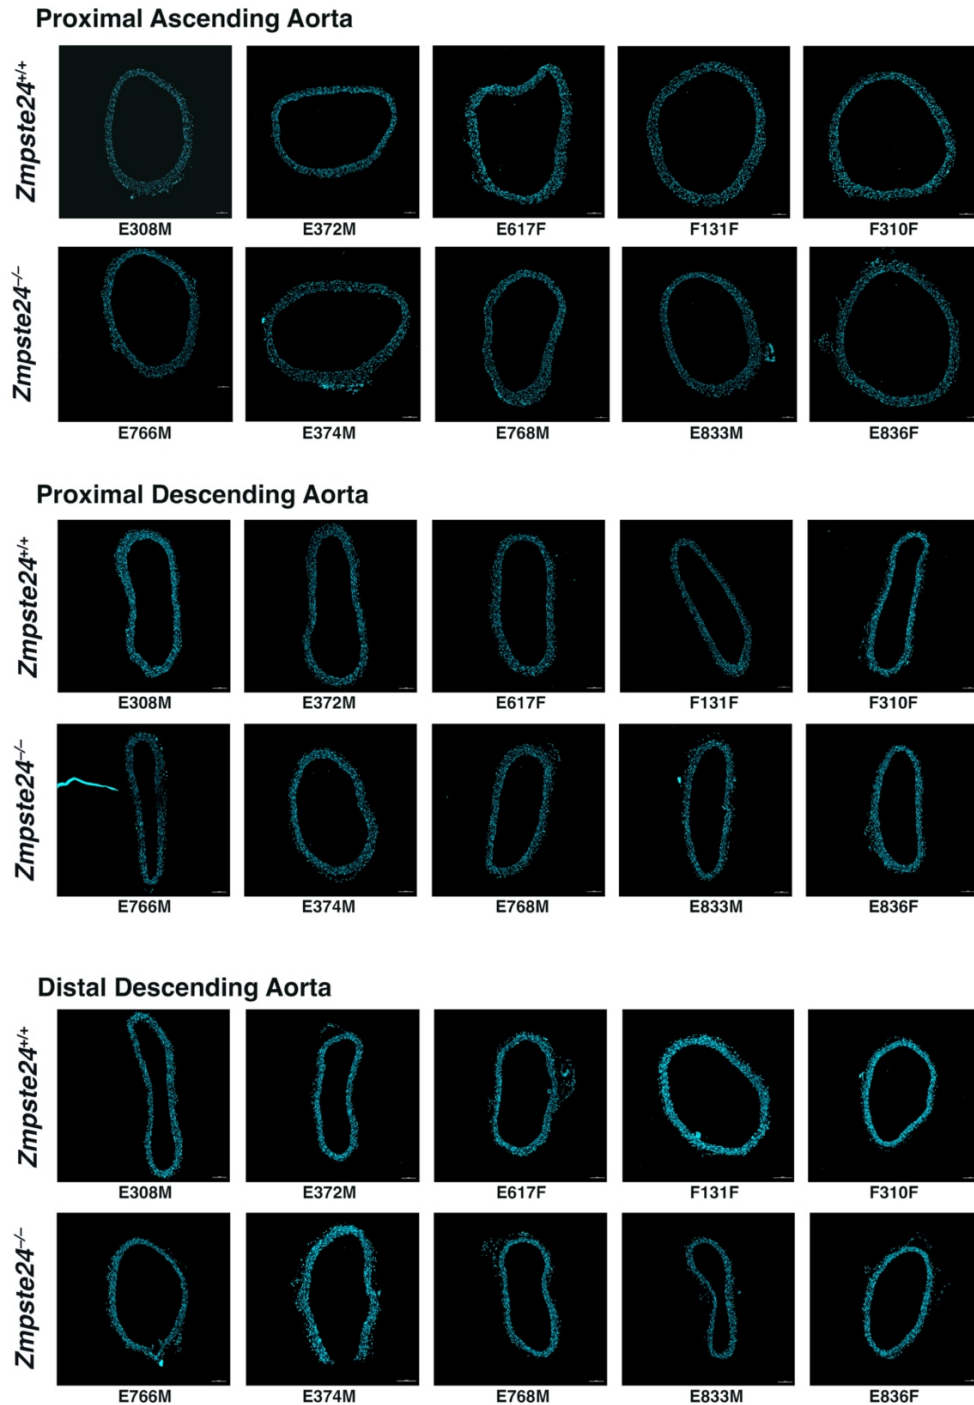

74

75 **Fig. S2. Loss of smooth muscle cells is not detected in the thoracic aorta of  $Zmpste24^{-/-}$  mice.**

76 Microscopy images of the proximal ascending, proximal descending, and distal descending aorta

77 from 21-week-old  $Zmpste24^{+/+}$  and  $Zmpste24^{-/-}$  mice (5 mice/group) stained with Dapi (blue). The

78 mouse IDs are shown below each image. Scale bar, 100  $\mu$ m. The images of the proximal ascending

79 aorta were used to generate the quantitative data reported in Fig. 1F.

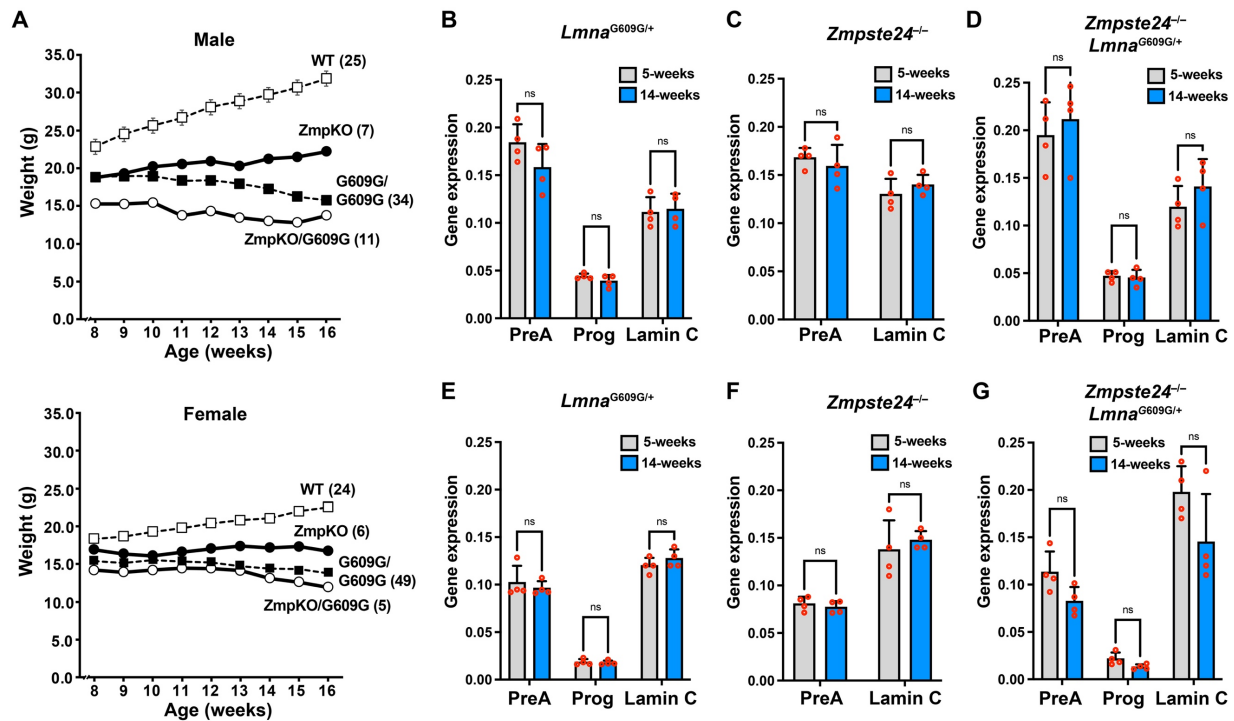

80 **Fig. S3. Transcript levels for the A-type nuclear lamins do not increase with age in the aorta**  
 81 **or heart of *Lmna*<sup>G609G/+</sup>, *Zmpste24*<sup>-/-</sup>, or *Zmpste24*<sup>-/-</sup>*Lmna*<sup>G609G/+</sup> mice.** **A.** Body weight curves  
 82 for male (upper) and female (lower) *Lmna*<sup>+/+</sup> (WT), *Lmna*<sup>G609G/G609G</sup> (G609G/G609G), *Zmpste24*<sup>-/-</sup>  
 83 *ZmpKO*, and *Zmpste24*<sup>-/-</sup>*Lmna*<sup>G609G/+</sup> (*ZmpKO*/G609G) mice. The weight curves for the  
 84 *Lmna*<sup>+/+</sup> and *Lmna*<sup>G609G/G609G</sup> mice (dotted lines) are from animals generated in a different mouse  
 85 colony. The numbers of mice per group are shown in parentheses. Mean ± SEM. The error bars  
 86 for some data points are too small to see. **B–D.** Bar graphs showing prelamins A (PreA), progerin  
 87 (Prog), and lamin C gene expression (relative to *Ppia*) in aortas from young and old *Lmna*<sup>G609G/+</sup>,  
 88 *Zmpste24*<sup>-/-</sup>, and *Zmpste24*<sup>-/-</sup>*Lmna*<sup>G609G/+</sup> mice. Mean ± SEM (*n* = 4 mice/group). Student's *t* test.  
 89 ns, not significant. **E–G.** Bar graphs showing PreA, Prog, and lamin C gene expression (relative  
 90 to *Ppia*) in hearts from young and old *Lmna*<sup>G609G/+</sup>, *Zmpste24*<sup>-/-</sup>, and *Zmpste24*<sup>-/-</sup>*Lmna*<sup>G609G/+</sup> mice.  
 91 Mean ± SEM (*n* = 4 mice/group). Student's *t* test. ns, not significant.

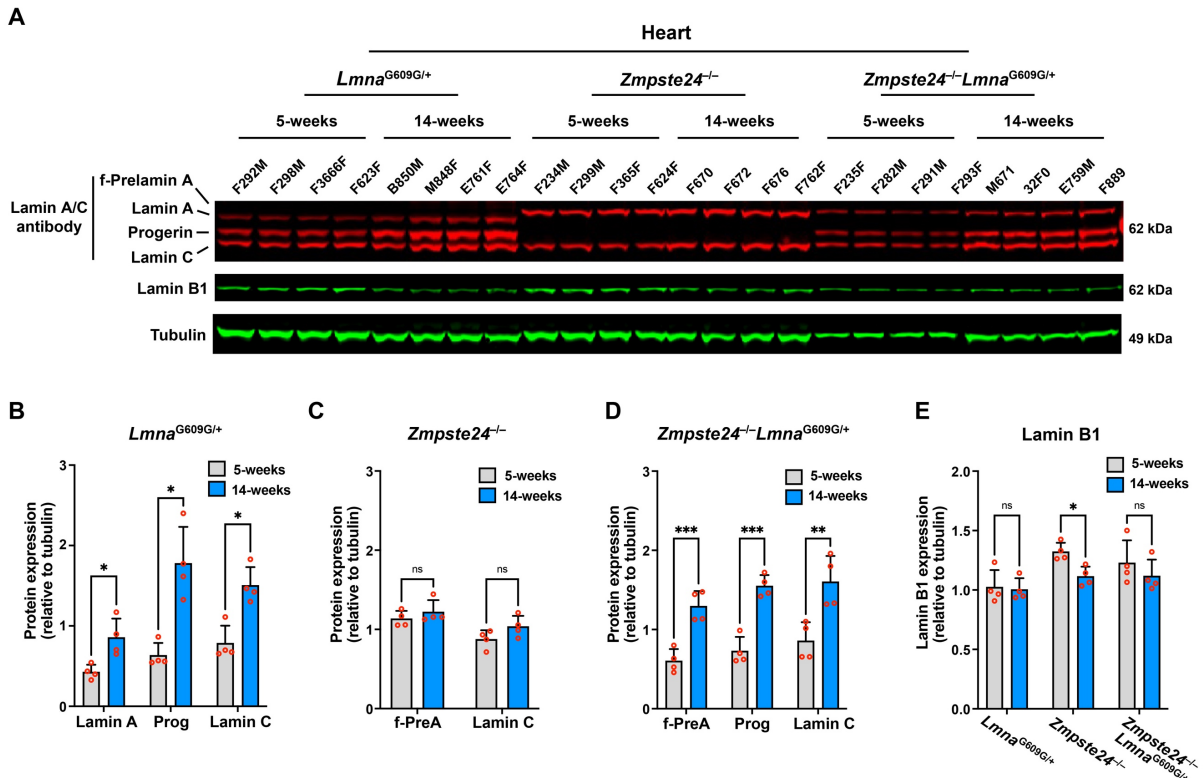

92 **Fig. S4. Progerin causes the accumulation of the A-type nuclear lamins in the heart. A.**  
 93 Western blot comparing the expression of lamin A, lamin C, farnesyl-prelamin A, progerin, and  
 94 lamin B1 in hearts from 5- and 14-week-old *Lmna*<sup>G609G/+</sup>, *Zmpste24*<sup>-/-</sup>, and *Zmpste24*<sup>-/-</sup>*Lmna*<sup>G609G/+</sup>  
 95 mice. Tubulin was measured as a loading control. The ages and mouse IDs are shown above each  
 96 sample. **B.** Bar graph showing lamin A, progerin (Prog), and lamin C expression (relative to  
 97 tubulin) in hearts from young and old *Lmna*<sup>G609G/+</sup> mice. Mean  $\pm$  SEM ( $n = 4$  mice/group).  
 98 Student's  $t$  test. \*,  $P < 0.05$ . **C.** Bar graph showing farnesyl-prelamin A (f-PreA) and lamin C  
 99 expression (relative to tubulin) in hearts from young and old *Zmpste24*<sup>-/-</sup> mice. Mean  $\pm$  SEM ( $n =$   
 100  $4$  mice/group). Student's  $t$  test. ns, not significant. **D.** Bar graph showing f-PreA, Prog, and lamin  
 101 C expression (relative to tubulin) in hearts from young and old *Zmpste24*<sup>-/-</sup>*Lmna*<sup>G609G/+</sup> mice.  
 102 Mean  $\pm$  SEM ( $n = 4$  mice/group). Student's  $t$  test. \*\*,  $P < 0.01$ . \*\*\*,  $P < 0.001$ . **E.** Bar graph  
 103 showing lamin B1 expression (relative to tubulin) in aortas from young and old *Lmna*<sup>G609G/+</sup>,  
 104 *Zmpste24*<sup>-/-</sup>, and *Zmpste24*<sup>-/-</sup>*Lmna*<sup>G609G/+</sup> mice. Mean  $\pm$  SEM ( $n = 4$  mice/group). Student's  $t$  test.  
 105 \*,  $P < 0.05$ . ns, not significant.



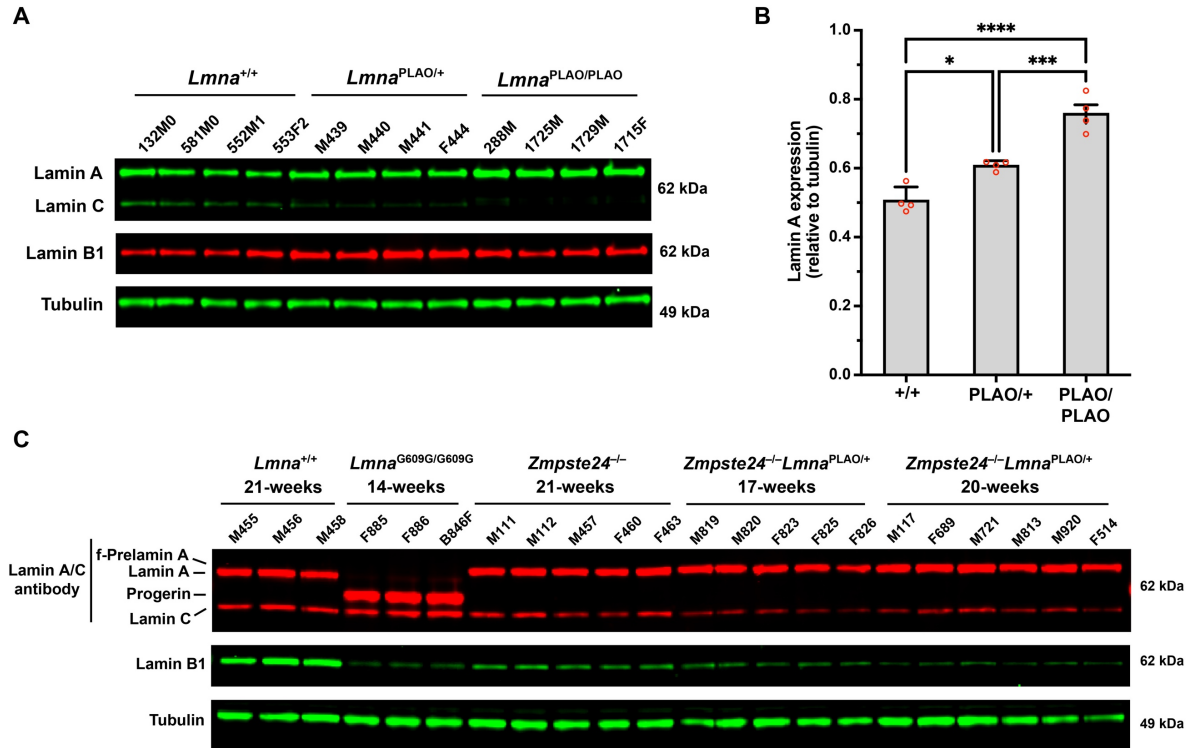

106 **Fig. S5. The *Lmna*<sup>PLAO</sup> allele increases lamin A levels in the aorta of *Zmpste24*<sup>+/+</sup> mice but**  
 107 **does not increase farnesyl-prelamin A levels in *Zmpste24*<sup>-/-</sup> mice. A.** Western blot comparing  
 108 the expression of lamin A, lamin C, and lamin B1 in aortas from *Lmna*<sup>+/+</sup>, *Lmna*<sup>PLAO/+</sup>, and  
 109 *Lmna*<sup>PLAO/PLAO</sup> mice. Tubulin was measured as a loading control. The mouse IDs are shown above  
 110 each sample. **B.** Bar graph showing lamin A expression (relative to tubulin) in aortas from *Lmna*<sup>+/+</sup>  
 111 (+/+), *Lmna*<sup>PLAO/+</sup> (PLAO/+), and *Lmna*<sup>PLAO/PLAO</sup> (PLAO/PLAO) mice. Mean ± SEM (*n* = 4  
 112 mice/group). ANOVA. \*, *P* < 0.05. \*\*\*, *P* < 0.001. \*\*\*\*, *P* < 0.0001. **C.** Western blot comparing  
 113 the expression of lamin A, lamin C, progerin, farnesyl-prelamin A, and lamin B1 in aortas from  
 114 *Lmna*<sup>+/+</sup>, *Lmna*<sup>G609G/G609G</sup>, *Zmpste24*<sup>-/-</sup>, and *Zmpste24*<sup>-/-</sup>*Lmna*<sup>PLAO/+</sup> mice. Tubulin was measured  
 115 as a loading control. The mouse IDs and ages are shown above each sample. The levels of farnesyl-  
 116 prelamin A in 21-week-old *Zmpste24*<sup>-/-</sup> mice (*n* = 5) and 20-week-old *Zmpste24*<sup>-/-</sup>*Lmna*<sup>PLAO/+</sup>  
 117 mice (*n* = 6) were judged not to be different (ANOVA; *P* = 0.12).

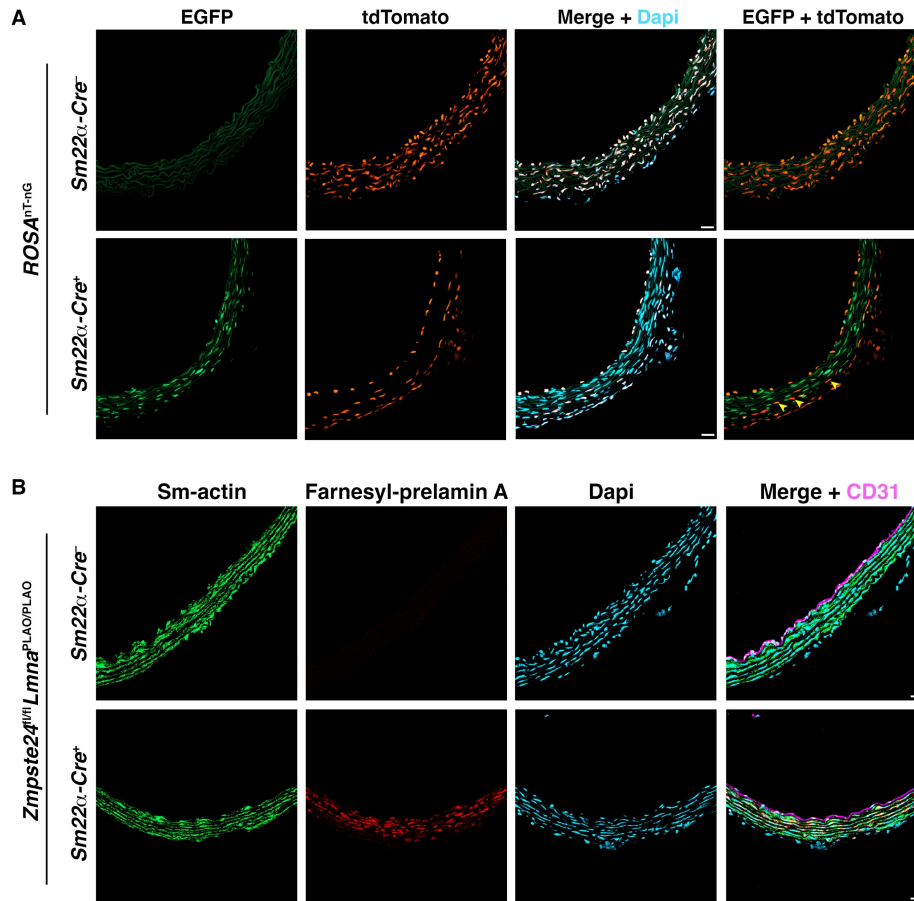

133 **Fig. S6. Inactivation of *Zmpste24* expression in SMCs results in farnesyl-prelamin A**  
134 **synthesis in aortic SMCs.** **A.** Confocal fluorescence microscopy images of the proximal  
135 ascending aorta of an 8-week-old *Sm22 $\alpha$ -Cre<sup>-</sup>Rosa<sup>nT-nG</sup>* (upper row) and *Sm22 $\alpha$ -Cre<sup>+</sup>Rosa<sup>nT-nG</sup>*  
136 (lower row) mouse. The *Rosa<sup>nT-nG</sup>* allele is a two-color reporter that expresses tdTomato in the  
137 nucleus (39). After *Cre* recombination, the *Rosa<sup>nT-nG</sup>* allele expresses EGFP, identifying cells that  
138 express *Cre*. The images show EGFP (green), tdTomato (red), and Dapi (blue). The yellow  
139 arrowheads point to SMCs in an *Sm22 $\alpha$ -Cre<sup>+</sup>Rosa<sup>nT-nG</sup>* mouse that still express tdTomato, showing  
140 that *Cre* is not expressed in all aortic SMCs of *Sm22 $\alpha$ -Cre<sup>+</sup>* mice. Scale bar, 20  $\mu$ m. **B.** Confocal  
141 fluorescence microscopy images of cryosections from the proximal ascending aorta of a 4-week-  
142 old *Sm22 $\alpha$ -Cre<sup>-</sup>Zmpste24<sup>fl/fl</sup>Lmna<sup>PLAO/PLAO</sup>* mouse (upper row) and *Sm22 $\alpha$ -*  
143 *Cre<sup>+</sup>Zmpste24<sup>fl/fl</sup>Lmna<sup>PLAO/PLAO</sup>* mouse (lower row) stained with antibodies against smooth muscle  
144 actin (Sm-actin, green), farnesyl-prelamin A (red), and CD31 (magenta). Nuclei were stained with  
145 Dapi (blue). Scale bar, 20  $\mu$ m.

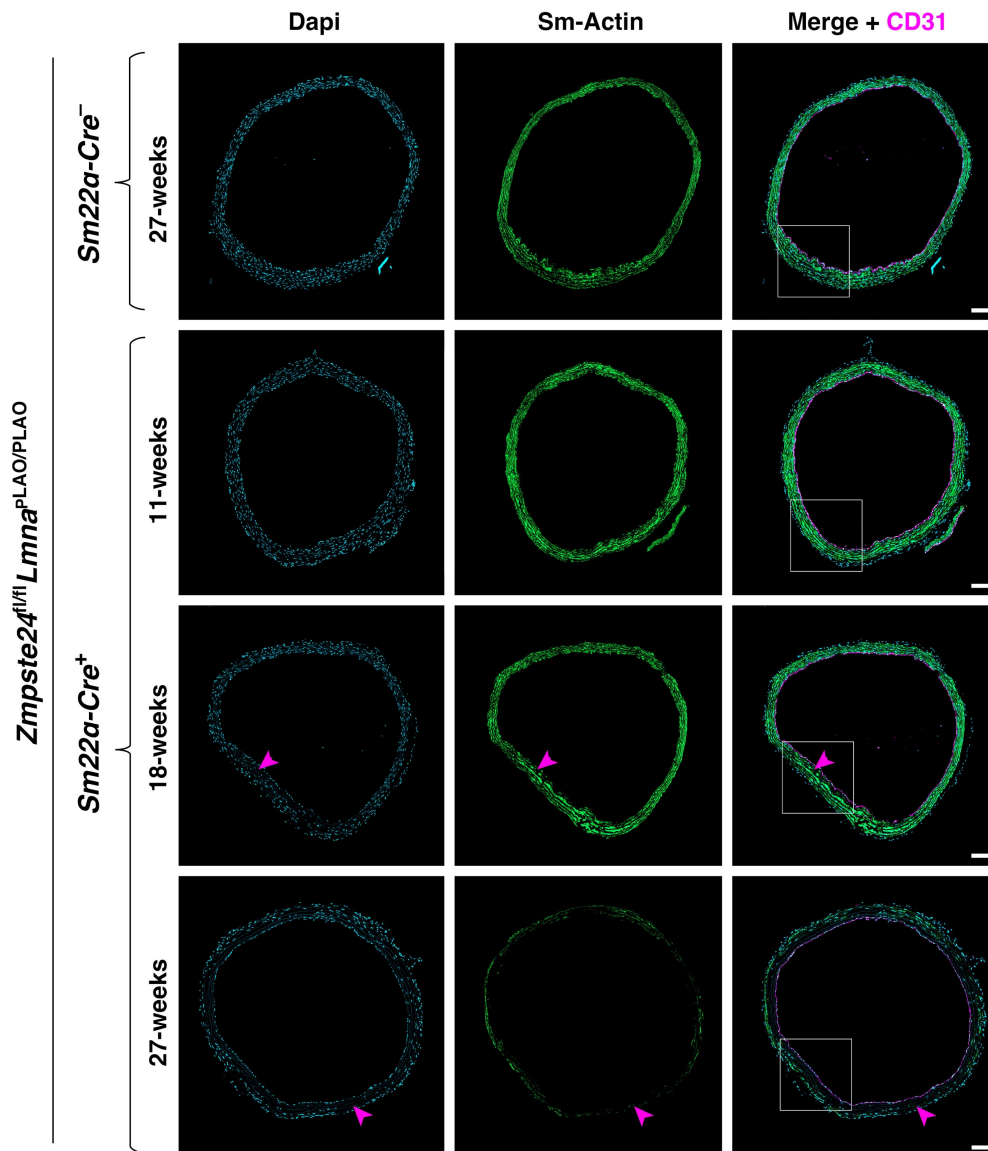

146 **Fig. S7. SMC loss and reduced smooth muscle actin staining in *Sm22α-***  
147 ***Cre<sup>+</sup>Zmpste24<sup>fl/fl</sup>Lmna<sup>PLAO/PLAO</sup>* mice.** Confocal fluorescence microscopy images of the proximal  
148 ascending aorta from 11-, 18-, and 27-week-old *Sm22α-Cre<sup>+</sup>Zmpste24<sup>fl/fl</sup>Lmna<sup>PLAO/PLAO</sup>* mice  
149 stained with antibodies against smooth muscle actin (Sm-actin, *green*) and CD31 (*magenta*).  
150 Nuclei were stained with Dapi (*blue*). As a control, images from a 27-week-old *Sm22α-Cre<sup>-</sup>*  
151 *Zmpste24<sup>fl/fl</sup>Lmna<sup>PLAO/PLAO</sup>* mouse are shown. Scale bar, 100  $\mu$ m. *Red* arrowheads point to areas  
152 with reduced Sm-actin staining and reduced numbers of SMC nuclei. The boxed regions are shown  
153 at higher magnification in Fig. 5C.

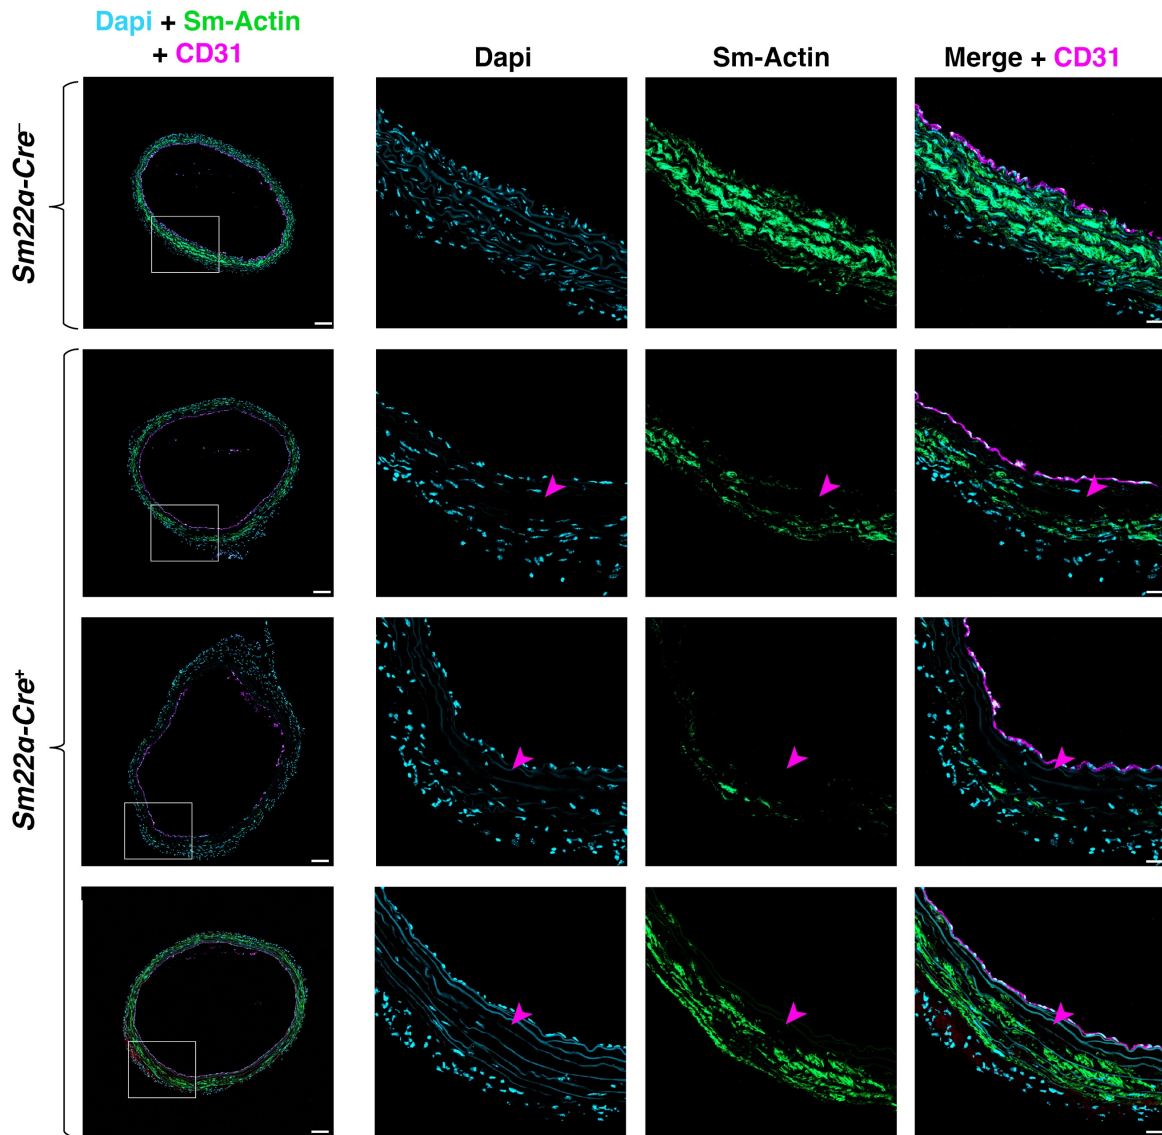

154 **Fig. S8. Farnesyl-prelamin A causes SMC loss in the aorta of 27-week-old *Sm22α-***  
155 ***Cre<sup>+</sup>Zmpste24<sup>fl/fl</sup>Lmna<sup>PLAO/PLAO</sup>* mice.** Confocal fluorescence microscopy images of the proximal  
156 ascending aorta from 27-week-old *Sm22α-Cre<sup>+</sup>Zmpste24<sup>fl/fl</sup>Lmna<sup>PLAO/PLAO</sup>* mice stained with  
157 antibodies against smooth muscle actin (Sm-actin, *green*) and CD31 (*magenta*). Nuclei were  
158 stained with Dapi (*blue*). As a control, images from a 27-week-old *Sm22α-Cre<sup>-</sup>*  
159 *Zmpste24<sup>fl/fl</sup>Lmna<sup>PLAO/PLAO</sup>* mouse are shown. Scale bar, 100 μm. Each row represents a different  
160 mouse. The boxed regions are shown at higher magnification to the right. *Red* arrowheads point to  
161 areas with reduced Sm-actin staining and reduced numbers of SMC nuclei. Scale bar, 20 μm.

162 **Table S1. Antibodies used for western blotting and immunocytochemistry.**  
163

| Antibody Description                 | Species | Source             | Catalog #   | Use       | Dilution      |
|--------------------------------------|---------|--------------------|-------------|-----------|---------------|
| Akt (pan)                            | Rabbit  | Cell Signaling     | 4691        | WB        | 1:1000        |
| $\beta$ -actin                       | Mouse   | Santa Cruz Biotech | SC47778     | WB        | 1:3000        |
| CD31 (clone 2H8)                     | Hamster | DSHB               | AB_2161039  | IF        | 10 $\mu$ g/ml |
| Collagen Type VIII                   | Rabbit  | Antibodies-online  | ABIN1718654 | IF        | 1:20          |
| Human lamin A                        | Mouse   | Millipore          | MAB3211     | WB,<br>IF | 1:1500        |
| Human lamin A/C                      | Rabbit  | Abcam              | Ab108595    | WB,<br>IF | 1:1000        |
| Human lamin A/C-Alexa 488 conjugated | Rabbit  | Abcam              | Ab185014    | IF        | 1:1000        |
| Lamin A/C                            | Mouse   | Santa Cruz Biotech | SC376248    | WB,<br>IF | 1:1000        |
| Lamin B1                             | Goat    | Santa Cruz Biotech | SC6217      | WB,<br>IF | 1:1500        |
| Lamin B1                             | Rabbit  | Invitrogen         | 702972      | WB,<br>IF | 1:1000        |
| Prelamin A                           | Rat     | In-house           | clone 3C8   | WB        | 1:1000        |
| Phospho-Lamin A/C (Ser404)           | Rabbit  | Millipore Sigma    | ABT1387     | WB        | 1:500         |
| Phospho-Akt (Ser473)                 | Rabbit  | Cell Signaling     | 4060        | WB        | 1:1000        |
| Sm-actin                             | Goat    | Sigma              | SAB2500963  | IF        | 1:100         |
| Tubulin                              | Rat     | Novus Bio          | NB600-506   | WB        | 1:3000        |
| Anti-rabbit IR800                    | Donkey  | LI-COR             | 926-32213   | WB        | 1:10000       |
| Anti-goat IR800                      | Donkey  | LI-COR             | 926-32214   | WB        | 1:10000       |
| Anti-rat IR800                       | Donkey  | ThermoFisher       | SA5-10032   | WB        | 1:5000        |
| Anti-mouse IR800                     | Donkey  | ThermoFisher       | SA5-10172   | WB        | 1:5000        |
| Anti-rabbit IR680                    | Donkey  | LI-COR             | 926-32221   | WB        | 1:5000        |
| Anti-rat IR680                       | Goat    | LI-COR             | 925-68076   | WB        | 1:5000        |
| Anti-goat IR680                      | Donkey  | LI-COR             | 926-68074   | WB        | 1:5000        |
| Anti-mouse IR680                     | Donkey  | ThermoFisher       | SA5-10170   | WB        | 1:5000        |
| Anti-mouse Alexa 488                 | Donkey  | Invitrogen         | A21202      | IF        | 1:2000        |
| Anti-rabbit Alexa 488                | Donkey  | Invitrogen         | A21206      | IF        | 1:2000        |

|                       |        |            |        |    |        |
|-----------------------|--------|------------|--------|----|--------|
| Anti-goat Alexa 488   | Donkey | Invitrogen | A11055 | IF | 1:2000 |
| Anti-goat Alexa 555   | Donkey | Invitrogen | A21432 | IF | 1:2000 |
| Anti-rabbit Alexa 555 | Donkey | Invitrogen | A31572 | IF | 1:200  |
| Anti-rabbit Alexa 568 | Donkey | Invitrogen | A10042 | IF | 1:2000 |
| Anti-mouse Alexa 568  | Donkey | Invitrogen | A10037 | IF | 1:2000 |
| Anti-mouse Alexa 647  | Donkey | Invitrogen | A31571 | IF | 1:2000 |

164

165 **Table S2. Quantitative RT-PCR primers.**

166

| <b>Gene or transcript</b> | <b>Forward (5'–3')</b>  | <b>Reverse (5'–3')</b>         |
|---------------------------|-------------------------|--------------------------------|
| <i>Ppia</i>               | TGAGCACTGGAGAGAAAGGA    | CCATTATGGCGTGTAAGTCA           |
| <i>Lmna</i>               | CCTATCGAAAGCTGCTGGAG    | CCTGAGACTGGGATGAGTGG           |
| <i>Lmnb1</i>              | CAACTGACCTCATCTGGAAGAAC | TGAAGACTGTGCTTCTCTGAGC         |
| Lamin C                   | GACAATGAGGATGACGACGAG   | TTAATGAAAAGACTTTGGCATGG        |
| Progerin                  | CTGAGTACAACCTGCGCTCA    | CATGATGCTGCAGTTCTGGGAGCTCTGGAC |
| Prelamin A                | GGTTGAGGACAATGAGGATGA   | TGAGCGCAGGTTGTACTCAG           |
| <i>Zmpste24</i>           | CCTCTGTTTGACAAATTCACACC | AACGCTTAGATCCTTCAACAACA        |

167

168 **Table S3. Description of cell lines.**

169

| Cell line                                                  | Modification                                       | Source   | Validation method                     | Mycoplasma contamination |
|------------------------------------------------------------|----------------------------------------------------|----------|---------------------------------------|--------------------------|
| hu-prelamin A-SMC                                          | human (hu)-prelamin A-pTRIPZ                       | In-house | Western blotting and microscopy       | No                       |
| hu-progerin-SMC                                            | hu-progerin-pTRIPZ                                 | In-house | Western blotting and microscopy       | No                       |
| hu-prelamin A-SMC + nls-GFP                                | hu-prelamin A-pTRIPZ + nls-GFP-pCLNR               | In-house | Microscopy                            | No                       |
| hu-progerin-SMC + nls-GFP                                  | hu-progerin-pTRIPZ + nls-GFP-pCLNR                 | In-house | Microscopy                            | No                       |
| <i>Zmpste24</i> <sup>-/-</sup> -SMC                        | CRISPR/Cas9 deletion of <i>Zmpste24</i>            | In-house | Western blotting, qPCR and sequencing | No                       |
| <i>Lmna</i> <sup>-/-</sup> -SMC                            | CRISPR/Cas9 deletion of <i>Lmna</i>                | In-house | Western blotting, qPCR and sequencing | No                       |
| <i>Zmpste24</i> <sup>-/-</sup> -SMC + hu-prelamin A-pTRIPZ | human (hu)-prelamin A-pTRIPZ                       | In-house | Western blotting and microscopy       | No                       |
| <i>Zmpste24</i> <sup>-/-</sup> -SMC + nls-GFP              | <i>Zmpste24</i> <sup>-/-</sup> + nls-GFP-pCLNR     | In-house | Microscopy                            | No                       |
| <i>Zmpste24</i> <sup>-/-</sup> -SMC + hu-progerin          | <i>Zmpste24</i> <sup>-/-</sup> + hu-progerin-pCLNR | In-house | Western blotting and microscopy       | No                       |

170
